# Supplementary material for: Modification of the catalytic properties of the Au4 nanocluster for the conversion of methane-to-methanol: synergistic effects of metallic adatoms and a defective graphene support
Source: Royal Society of Chemistry journal article supplement (doi:10.1039/c4cp05131a), 2015-01-01
Supplement: c4cp05131a1.pdf [file c4cp05131a1.pdf]

ARTICLE

# Modification of catalytic properties of the Au<sub>4</sub> nanocluster for the conversion of methane-to-methanol: Synergic effects of metallic adatoms and defective graphene support

Cite this: DOI: 10.1039/x0xx00000x

Received 00th January 2012,

Accepted 00th January 2012

DOI: 10.1039/x0xx00000x

www.rsc.org/

J. Sirijaraensre<sup>a,b</sup> and J. Limtrakul<sup>a,b,c,\*</sup>

**Table S1.** ZPE-corrected relative energies of the system along the steps of the catalytic cycle for the partial oxidation of methane by N<sub>2</sub>O over the graphene-deposited Au<sub>5</sub> catalyst. The energy of the isolated subsystems in their lowest-energy spin state is taken as zero.

| Steps                                                       | Relative Energy (kcal·mol <sup>-1</sup> ) |                    |
|-------------------------------------------------------------|-------------------------------------------|--------------------|
|                                                             | Doublet spin-state                        | Quartet spin-state |
| Isolated systems                                            | 0.0                                       | 18.8               |
| N <sub>2</sub> O adsorption                                 | -4.5                                      | 14.1               |
| N <sub>2</sub> O decomposition transition state (TS1)       | 11.6                                      | 21.7               |
| N <sub>2</sub> adsorption on Au <sub>5</sub> O              | -9.2                                      | -2.1               |
| N <sub>2</sub> desorption                                   | -5.9                                      | 1.4                |
| CH <sub>4</sub> adsorption                                  | -9.4                                      | 2.0                |
| C-H bond activation transition state (TS2)                  | 5.9                                       | 16.8               |
| Intermediate of C-H bond activation                         | -32.8                                     | -25.0              |
| <b>Two-centered recombination</b>                           |                                           |                    |
| C-O formation transition state (TS3)                        | 7.2                                       | 10.6               |
| <b>One-centered recombination</b>                           |                                           |                    |
| CH <sub>3</sub> Shift transition state (TS3 <sub>B1</sub> ) | -17.3                                     | -10.1              |
| IV <sub>B</sub> intermediate                                | -20.1                                     | -34.5              |
| C-O formation transition state (TS3 <sub>B2</sub> )         | 5.9                                       | 18.5               |
| CH <sub>3</sub> OH adsorption                               | -39.4                                     | -20.6              |
| CH <sub>3</sub> OH desorption                               | -28.9                                     | -10.1              |

**Table S2.** . ZPE-corrected relative energies of the system along the steps of the catalytic cycle for the partial oxidation of methane by N<sub>2</sub>O over the graphene-deposited Au<sub>4</sub>Pd catalyst. The energy of the isolated subsystems in their lowest-energy spin state is taken as zero.

| Steps                                                       | Relative Energy (kcal·mol <sup>-1</sup> ) |                    |
|-------------------------------------------------------------|-------------------------------------------|--------------------|
|                                                             | Singlet spin-state                        | Triplet spin-state |
| Isolated systems                                            | 0.0                                       | 0.8                |
| N <sub>2</sub> O adsorption                                 | -4.6                                      | -3.6               |
| N <sub>2</sub> O decomposition transition state (TS1)       | 9.2                                       | 11.1               |
| N <sub>2</sub> adsorption on Au <sub>4</sub> OPd            | -8.6                                      | -9.6               |
| N <sub>2</sub> desorption                                   | -5.2                                      | -6.0               |
| CH <sub>4</sub> adsorption                                  | -8.8                                      | -10.0              |
| C-H bond activation transition state (TS2)                  | 9.2                                       | 5.7                |
| Intermediate of C-H bond activation                         | -36.7                                     | -33.9              |
| <b>Two-centered recombination</b>                           |                                           |                    |
| C-O formation transition state (TS3)                        | 5.7                                       | 0.6                |
| <b>One-centered recombination</b>                           |                                           |                    |
| CH <sub>3</sub> Shift transition state (TS3 <sub>B1</sub> ) | -17.4                                     | -18.4              |
| IV <sub>B</sub> intermediate                                | -18.8                                     | -19.3              |
| C-O formation transition state (TS3 <sub>B2</sub> )         | 6.5                                       | 5.6                |
| CH <sub>3</sub> OH adsorption                               | -41.1                                     | -39.0              |
| CH <sub>3</sub> OH desorption                               | -28.9                                     | -28.1              |

**Table S3.** ZPE-corrected relative energies of the system along the steps of the catalytic cycle for the partial oxidation of methane by N<sub>2</sub>O over the graphene-deposited Au<sub>4</sub>Pt catalyst. The energy of the isolated subsystems in their lowest-energy spin state is taken as zero.

| Steps                                                       | Relative Energy (kcal·mol <sup>-1</sup> ) |                    |
|-------------------------------------------------------------|-------------------------------------------|--------------------|
|                                                             | Singlet spin-state                        | Triplet spin-state |
| Isolated systems                                            | 0.0                                       | 3.5                |
| N <sub>2</sub> O adsorption                                 | -4.6                                      | -1.0               |
| N <sub>2</sub> O decomposition transition state (TS1)       | 7.2                                       | 12.4               |
| N <sub>2</sub> adsorption on Au <sub>4</sub> OPt            | -11.3                                     | -6.0               |
| N <sub>2</sub> desorption                                   | -8.1                                      | -2.6               |
| CH <sub>4</sub> adsorption                                  | -10.5                                     | -4.9               |
| C-H bond activation transition state (TS2)                  | 7.2                                       | 7.9                |
| Intermediate of C-H bond activation                         | -35.2                                     | -30.2              |
| <b>Two-centered recombination</b>                           |                                           |                    |
| C-O formation transition state (TS3)                        | 6.5                                       | 3.3                |
| <b>One-centered recombination</b>                           |                                           |                    |
| CH <sub>3</sub> Shift transition state (TS3 <sub>B1</sub> ) | -19.6                                     | -15.5              |
| IV <sub>B</sub> intermediate                                | -21.6                                     | -16.6              |
| C-O formation transition state (TS3 <sub>B2</sub> )         | 6.6                                       | 7.5                |
| CH <sub>3</sub> OH adsorption                               | -41.2                                     | -36.1              |
| CH <sub>3</sub> OH desorption                               | -28.9                                     | -25.4              |

**Table S4.** Optimized geometries of complexes along the steps of the catalytic cycle for the N<sub>2</sub>O decomposition over the Au<sub>5</sub>/graphene. The values in parenthesis are for the high-spin state. (Distances are in Angstroms)

| Parameters | Steps            |                             |                |                                               |
|------------|------------------|-----------------------------|----------------|-----------------------------------------------|
|            | Isolated systems | N <sub>2</sub> O adsorption | TS1            | N <sub>2</sub> adsorption on OAu <sub>5</sub> |
| N-N        | 1.13             | 1.14<br>(1.14)              | 1.16<br>(1.16) | 1.11<br>(1.11)                                |
| N-O        | 1.18             | 1.19<br>(1.19)              | 1.74<br>(1.61) |                                               |
| Au1-Au4    | 2.86<br>(2.86)   | 2.87<br>(2.86)              | 3.05<br>(2.92) | 2.82<br>(2.85)                                |
| Au1-O      |                  | 3.23<br>(3.22)              | 2.02<br>(2.07) | 2.07<br>(2.15)                                |
| Au4-O      |                  |                             |                | 2.07<br>(2.15)                                |

**Table S5.** Optimized geometries of complexes along the steps of the catalytic cycle for the partial oxidation of methane over the Au<sub>5</sub>O/graphene. The values in parenthesis are for the high-spin state. (Distances are in Angstroms)

| Parameters    | Steps            |                            |                |                 |                |                     |
|---------------|------------------|----------------------------|----------------|-----------------|----------------|---------------------|
|               | Isolated systems | CH <sub>4</sub> adsorption | TS2            | Intermediate IV | TS3            | Methanol adsorption |
| C-H (methane) | 1.09             | 1.09<br>(1.09)             | 1.29<br>(1.32) |                 |                |                     |
| H-O           |                  | 2.45<br>(2.96)             | 1.39<br>(1.25) | 0.96<br>(0.97)  | 0.97<br>(0.97) | 0.96<br>(0.96)      |
| Au1-Au4       | 2.82<br>(2.85)   | 2.82<br>(2.88)             | 3.02<br>(2.90) | 3.06<br>(2.90)  | 2.95<br>(2.94) | 2.88<br>(2.86)      |
| Au1-O         | 2.07<br>(2.15)   | 2.06<br>(2.15)             | 1.97<br>(2.05) | 2.06<br>(2.05)  | 2.24<br>(2.17) | 2.54<br>(2.52)      |
| Au4-O         | 2.07<br>(2.15)   | 2.07<br>(2.14)             |                |                 |                |                     |
| Au4-C         |                  |                            | 2.40<br>(2.44) | 2.08<br>(2.07)  | 2.52<br>(2.85) |                     |
| C-O           |                  |                            |                |                 | 2.06<br>(2.13) | 1.43<br>(1.43)      |

**Table S6.** Optimized geometries of complexes along the steps of the catalytic cycle for the formation of methanol through the one-centered recombination transition state over the Au<sub>5</sub>O/graphene. The values in parenthesis are for the high-spin state. (Distances are in Angstroms)

| Parameters | Steps             |                              |                   |
|------------|-------------------|------------------------------|-------------------|
|            | TS3 <sub>B1</sub> | IV <sub>B</sub> intermediate | TS3 <sub>B2</sub> |
| H-O        | 0.96<br>(0.97)    | 0.97<br>(0.96)               | 0.97<br>(0.97)    |
| Au1-Au4    | 2.66<br>(2.69)    | 2.66<br>(2.84)               | 2.70<br>(2.68)    |
| Au1-O      | 2.11<br>(2.11)    | 2.10<br>(2.24)               | 2.22<br>(2.23)    |
| Au1-C      | 2.11<br>(2.12)    | 2.09<br>(2.05)               | 2.42<br>(2.53)    |
| Au4-C      | 3.14<br>(3.16)    |                              |                   |
| C-O        |                   |                              | 2.00<br>(2.05)    |

**Table S7.** Optimized geometries of complexes along the steps of the catalytic cycle for the N<sub>2</sub>O decomposition over the Au<sub>4</sub>Pd/graphene. The values in parenthesis are for the high-spin state. (Distances are in Angstroms)

| Parameters | Steps            |                             |                |                                                  |
|------------|------------------|-----------------------------|----------------|--------------------------------------------------|
|            | Isolated systems | N <sub>2</sub> O adsorption | TS1            | N <sub>2</sub> adsorption on OAu <sub>4</sub> Pd |
| N-N        | 1.13             | 1.14<br>(1.14)              | 1.16<br>(1.16) | 1.11<br>(1.11)                                   |
| N-O        | 1.18             | 1.19<br>(1.19)              | 1.68<br>(1.63) |                                                  |
| Au1-Au4    | 2.85<br>(2.81)   | 2.85<br>(2.81)              | 3.04<br>(3.11) | 2.91<br>(2.99)                                   |
| Au1-O      |                  | 2.97<br>(3.22)              | 2.04<br>(2.07) | 2.05<br>(2.05)                                   |
| Au4-O      |                  |                             |                | 2.09<br>(2.12)                                   |

**Table S8.** Optimized geometries of complexes along the steps of the catalytic cycle for the partial oxidation of methane over the Au<sub>4</sub>OPd/graphene. The values in parenthesis are for the high-spin state. (Distances are in Angstroms)

| Parameters    | Steps            |                            |                |                 |                |                     |
|---------------|------------------|----------------------------|----------------|-----------------|----------------|---------------------|
|               | Isolated systems | CH <sub>4</sub> adsorption | TS2            | Intermediate IV | TS3            | Methanol adsorption |
| C-H (methane) | 1.09             | 1.09<br>(1.09)             | 1.30<br>(1.33) |                 |                |                     |
| H-O           |                  | 2.50<br>(2.54)             | 1.35<br>(1.25) | 0.96<br>(0.97)  | 0.97<br>(0.97) | 0.96<br>(0.97)      |
| Au1-Au4       | 2.91<br>(2.99)   | 2.91<br>(3.00)             | 3.00<br>(2.98) | 2.91<br>(2.95)  | 2.98<br>(2.95) | 2.86<br>(2.73)      |
| Au1-O         | 2.04<br>(2.04)   | 2.04<br>(2.04)             | 1.99<br>(2.04) | 2.06<br>(2.04)  | 2.25<br>(2.17) | 2.46<br>(2.65)      |
| Au4-O         | 2.09<br>(2.13)   | 2.11<br>(2.17)             |                |                 |                |                     |
| Au4-C         |                  |                            | 2.43<br>(2.43) | 2.08<br>(2.08)  | 2.52<br>(2.79) |                     |
| C-O           |                  |                            |                |                 | 2.04<br>(2.16) | 1.43<br>(1.42)      |

**Table S9.** Optimized geometries of complexes along the steps of the catalytic cycle for the formation of methanol through the one-centered recombination transition state over the Au<sub>4</sub>OPd/graphene. The values in parenthesis are for the high-spin state. (Distances are in Angstroms)

| Parameters | Steps             |                              |                   |
|------------|-------------------|------------------------------|-------------------|
|            | TS3 <sub>B1</sub> | IV <sub>B</sub> intermediate | TS3 <sub>B2</sub> |
| H-O        | 0.96<br>(0.97)    | 0.97<br>(0.97)               | 0.97<br>(0.97)    |
| Au1-Au4    | 2.67<br>(2.68)    | 2.67<br>(2.66)               | 2.67<br>(2.66)    |
| Au1-O      | 2.11<br>(2.14)    | 2.11<br>(2.09)               | 2.20<br>(2.20)    |
| Au1-C      | 2.12<br>(2.09)    | 2.10<br>(2.10)               | 2.42<br>(2.42)    |
| Au4-C      | 3.17<br>(3.43)    |                              |                   |
| C-O        |                   |                              | 2.02<br>(2.02)    |

**Table S10.** Optimized geometries of complexes along the steps of the catalytic cycle for the N<sub>2</sub>O decomposition over the Au<sub>4</sub>Pt/graphene. The values in parenthesis are for the high-spin state. (Distances are in Angstroms)

| Parameters | Steps            |                             |                |                                                  |
|------------|------------------|-----------------------------|----------------|--------------------------------------------------|
|            | Isolated systems | N <sub>2</sub> O adsorption | TS1            | N <sub>2</sub> adsorption on OAu <sub>4</sub> Pt |
| N-N        | 1.13             | 1.14<br>(1.14)              | 1.16<br>(1.16) | 1.11<br>1.11                                     |
| N-O        | 1.18             | 1.19<br>(1.19)              | 1.71<br>(1.64) |                                                  |
| Au1-Au4    | 2.87<br>(2.83)   | 2.88<br>(2.83)              | 3.03<br>(2.97) | 2.80<br>(2.98)                                   |
| Au1-O      |                  | 2.99<br>(3.16)              | 2.03<br>(2.05) | 2.07<br>(2.04)                                   |
| Au4-O      |                  |                             |                | 2.11<br>(2.12)                                   |

**Table S11.** Optimized geometries of complexes along the steps of the catalytic cycle for the partial oxidation of methane over the Au<sub>4</sub>OPt/graphene. The values in parenthesis are for the high-spin state. (Distances are in Angstroms)

| Parameters    | Steps            |                            |                |                 |                |                     |
|---------------|------------------|----------------------------|----------------|-----------------|----------------|---------------------|
|               | Isolated systems | CH <sub>4</sub> adsorption | TS2            | Intermediate IV | TS3            | Methanol adsorption |
| C-H (methane) | 1.09             | 1.09<br>(1.09)             | 1.29<br>(1.32) |                 |                |                     |
| H-O           |                  | 2.19<br>(2.26)             | 1.37<br>(1.27) | 0.97<br>(0.97)  | 0.97<br>(0.97) | 0.96<br>(0.96)      |
| Au1-Au4       | 2.79<br>(2.97)   | 2.80<br>(2.98)             | 3.03<br>(2.99) | 3.32<br>(3.02)  | 2.96<br>(2.90) | 2.88<br>(2.82)      |
| Au1-O         | 2.07<br>(2.04)   | 2.07<br>(2.05)             | 1.98<br>(2.03) | 2.04<br>(2.03)  | 2.27<br>(2.21) | 2.50<br>(2.58)      |
| Au4-O         | 2.11<br>(2.12)   | 2.11<br>(2.12)             |                |                 |                |                     |
| Au4-C         |                  |                            | 2.41<br>(2.42) | 2.08<br>(2.09)  | 2.52<br>(2.66) |                     |
| C-O           |                  |                            |                |                 | 2.03<br>(2.06) | 1.43<br>(1.43)      |

**Table S12.** Optimized geometries of complexes along the steps of the catalytic cycle for the formation of methanol through the one-centered recombination transition state over the Au<sub>4</sub>OPt/graphene. The values in parenthesis are for the high-spin state. (Distances are in Angstroms)

| Parameters | Steps             |                              |                   |
|------------|-------------------|------------------------------|-------------------|
|            | TS3 <sub>B1</sub> | IV <sub>B</sub> intermediate | TS3 <sub>B2</sub> |
| H-O        | 0.96<br>(0.97)    | 0.97<br>(0.97)               | 0.97<br>(0.97)    |
| Au1-Au4    | 2.65<br>(2.67)    | 2.65<br>(2.66)               | 2.66<br>(2.66)    |
| Au1-O      | 2.13<br>(2.14)    | 2.12<br>(2.09)               | 2.22<br>(2.19)    |
| Au1-C      | 2.11<br>(2.12)    | 2.09<br>(2.10)               | 2.44<br>(2.42)    |
| Au4-C      | 3.18<br>(3.28)    |                              |                   |
| C-O        |                   |                              | 2.01<br>(2.03)    |

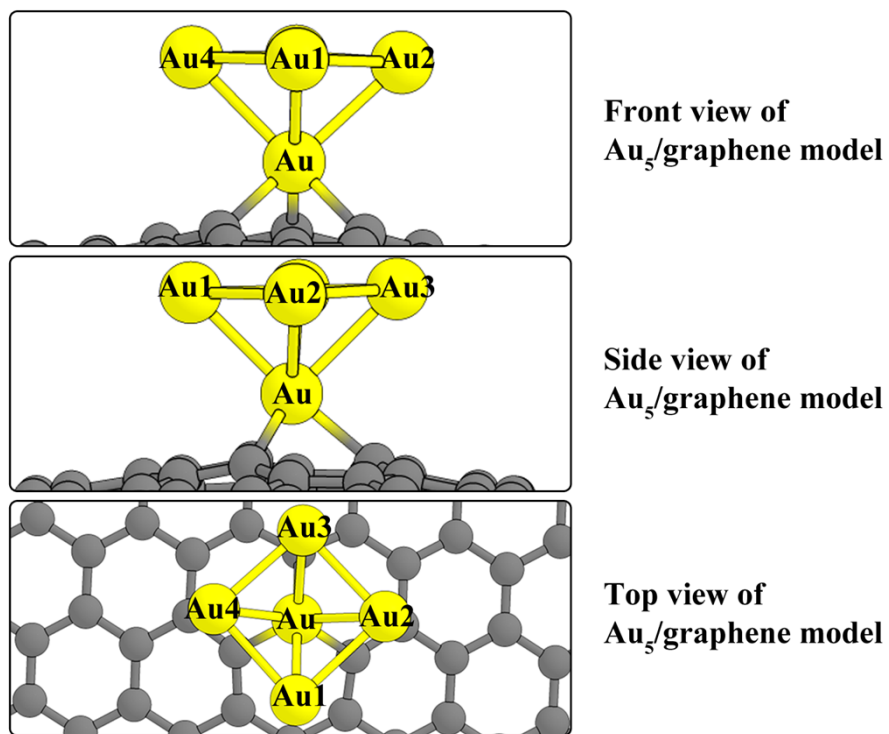

Fig. S1. Different views of the ground-state structure of Au<sub>5</sub>/graphene.

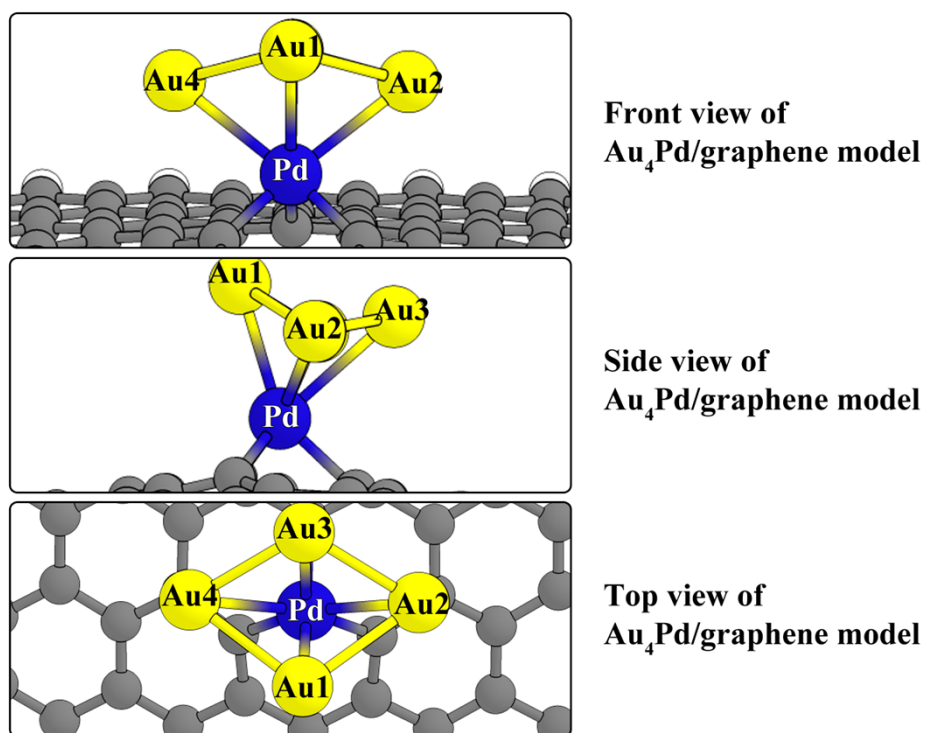

Fig. S2. Different views of the ground-state structure of the Au<sub>4</sub>Pd/graphene.

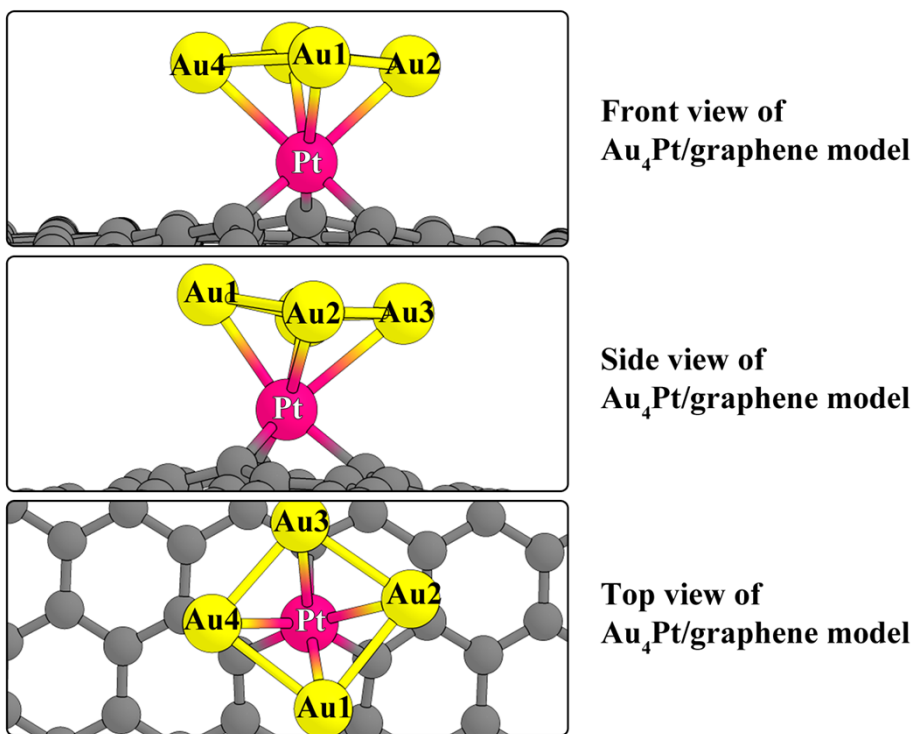

**Fig. S3.** Different views of the ground-state structure of the  $\text{Au}_4\text{Pt}$ /graphene.



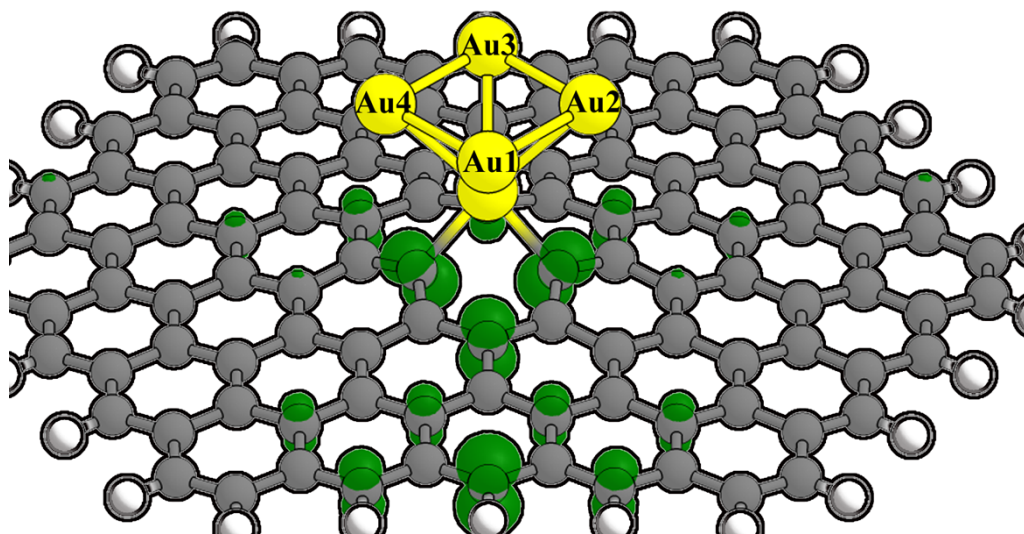

Fig. S4. Au<sub>5</sub> on graphene. Areas where spin polarization is larger than  $0.005 e\text{-}\text{\AA}^{-3}$  are shown in green.

| Complexes | Systems                                                                                                                        |                                                                                                                                 |                                                                                                                                   |
|-----------|--------------------------------------------------------------------------------------------------------------------------------|---------------------------------------------------------------------------------------------------------------------------------|-----------------------------------------------------------------------------------------------------------------------------------|
|           | Au <sub>5</sub> /graphene                                                                                                      | Au <sub>4</sub> Pd/graphene                                                                                                     | Au <sub>4</sub> Pt/graphene                                                                                                       |
| A1        | $E_{\text{deform}} = 10.9 \text{ kcal/mol}$ 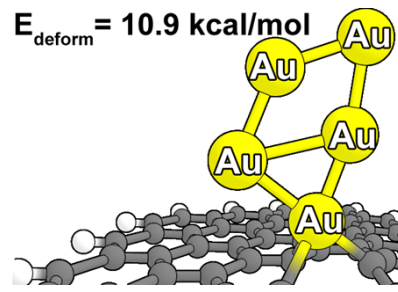  | $E_{\text{deform}} = 10.2 \text{ kcal/mol}$   | $E_{\text{deform}} = 8.9 \text{ kcal/mol}$     |
| A2        | $E_{\text{deform}} = 6.0 \text{ kcal/mol}$    | $E_{\text{deform}} = 75.1 \text{ kcal/mol}$   | $E_{\text{deform}} = 73.0 \text{ kcal/mol}$    |
| A3        | $E_{\text{deform}} = 6.2 \text{ kcal/mol}$   | $E_{\text{deform}} = 69.9 \text{ kcal/mol}$  | $E_{\text{deform}} = 107.1 \text{ kcal/mol}$  |
| A4        | $E_{\text{deform}} = 3.5 \text{ kcal/mol}$  |                                                                                                                                 |                                                                                                                                   |

**Fig. S5.** Different configurations of the ground-state structure of the Au<sub>5</sub>/graphene, Au<sub>4</sub>Pd/graphene, and Au<sub>4</sub>Pt/graphene, respectively. The deformation energies ( $E_{\text{deform}}$ ) as differences of their energies and the energy of their relating system in Fig. 1. The positive values indicate the instability of the complex as compared with the structure in Fig. 1.

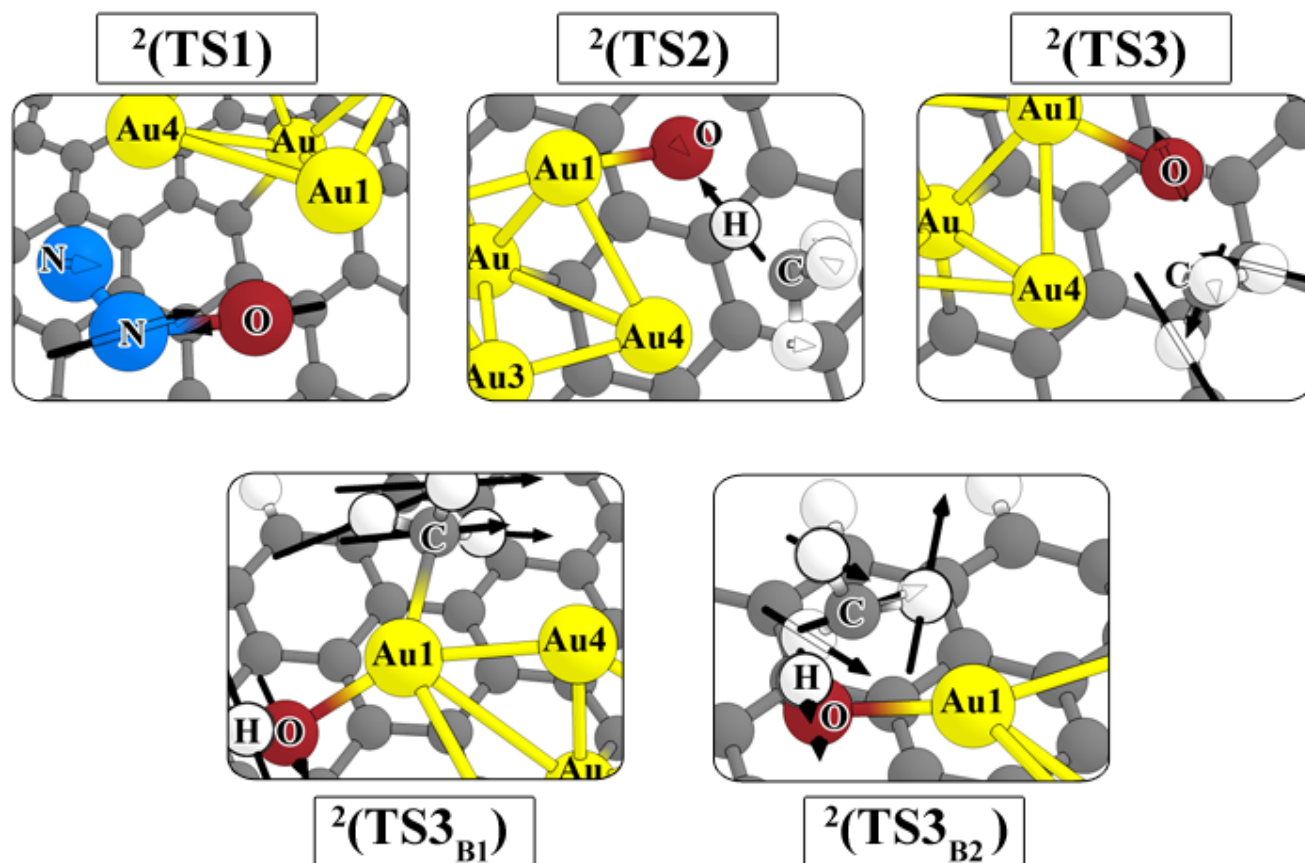

Fig. S6. Vibrational modes corresponding to the imaginary frequency at the transition states for partial oxidation of methane by N<sub>2</sub>O as oxidant over the Au<sub>5</sub>/graphene material. The superscript indicates the ground state of the transition state complexes.

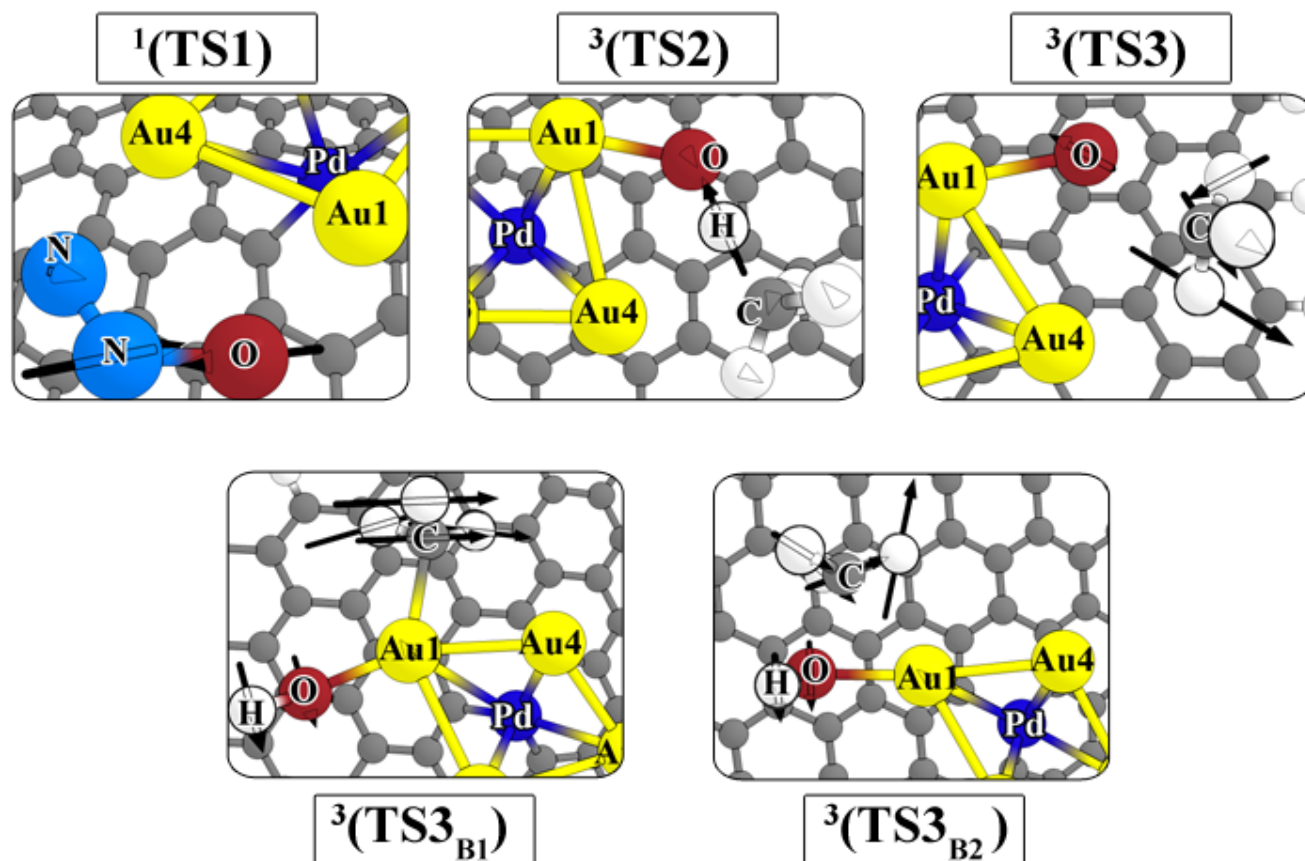

Fig. S7. Vibrational modes corresponding to the imaginary frequency at the transition states for partial oxidation of methane by N<sub>2</sub>O as oxidant over the Au<sub>4</sub>Pd/graphene material. The superscript indicates the ground state of the transition state complexes.

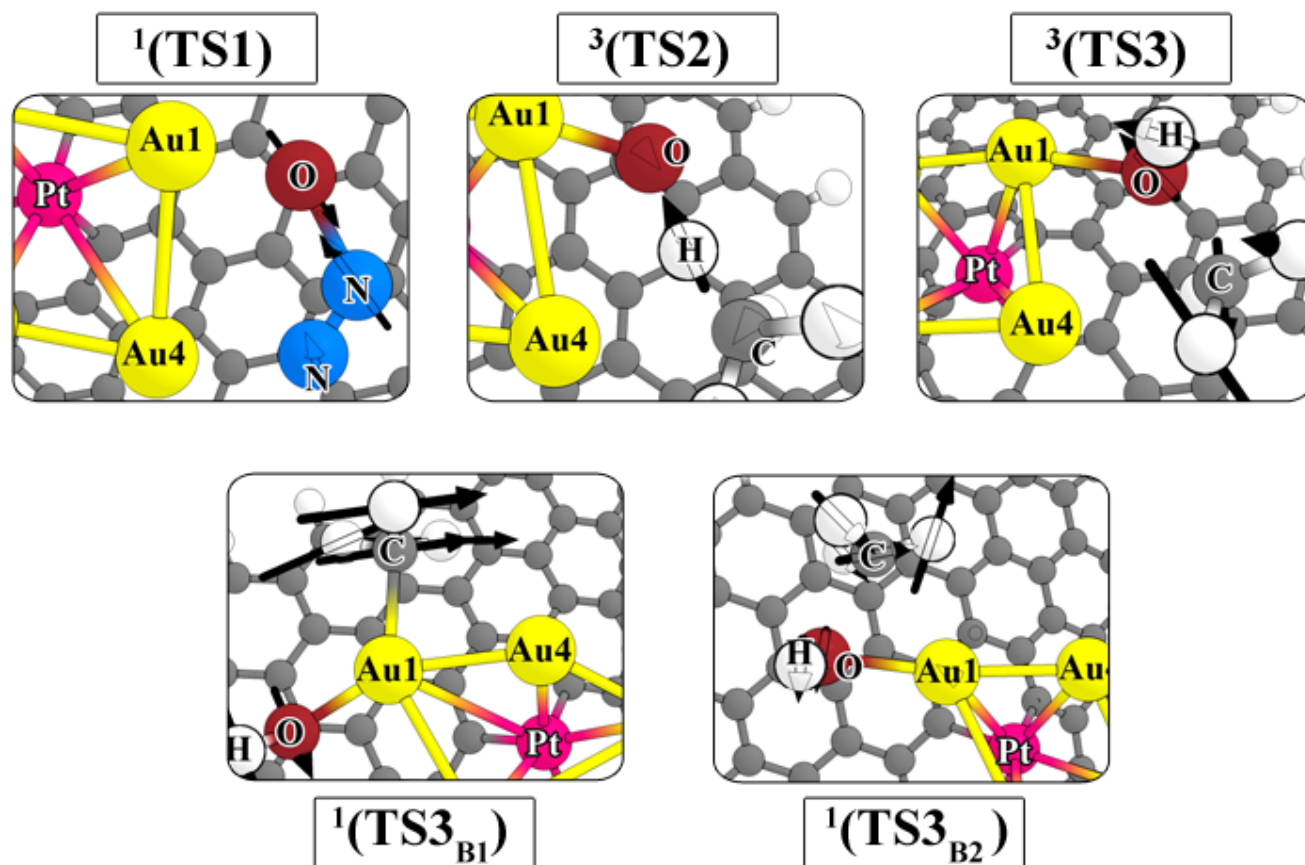

Fig. S8. Vibrational modes corresponding to the imaginary frequency at the transition states for partial oxidation of methane by N<sub>2</sub>O as oxidant over the Au<sub>4</sub>Pt/graphene material. The superscript indicates the ground state of the transition state complexes.

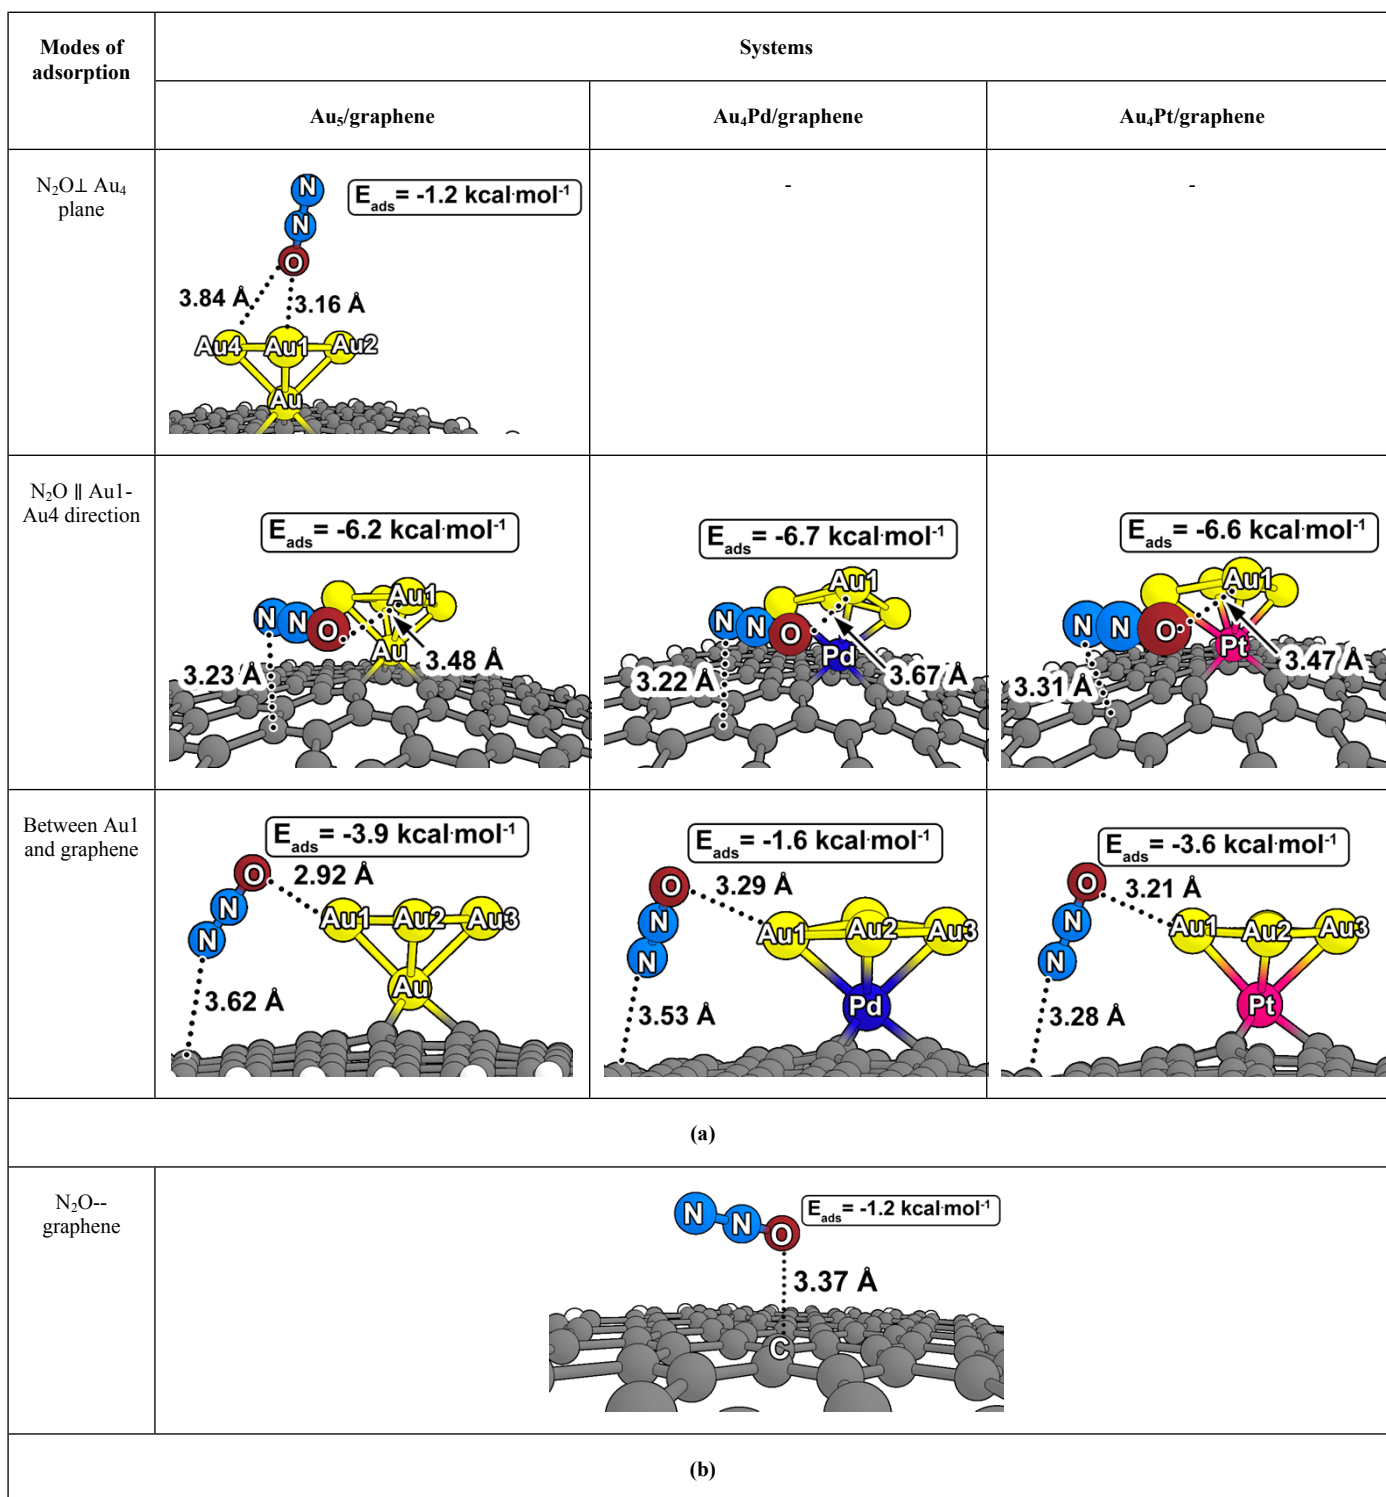

**Fig. S9.** Different configurations of N<sub>2</sub>O adsorption: (a) on the Au<sub>5</sub>/graphene, Au<sub>4</sub>Pd/graphene, and Au<sub>4</sub>Pt/graphene, respectively and (b) on the graphene. Energies are the adsorption energy of the complexes.

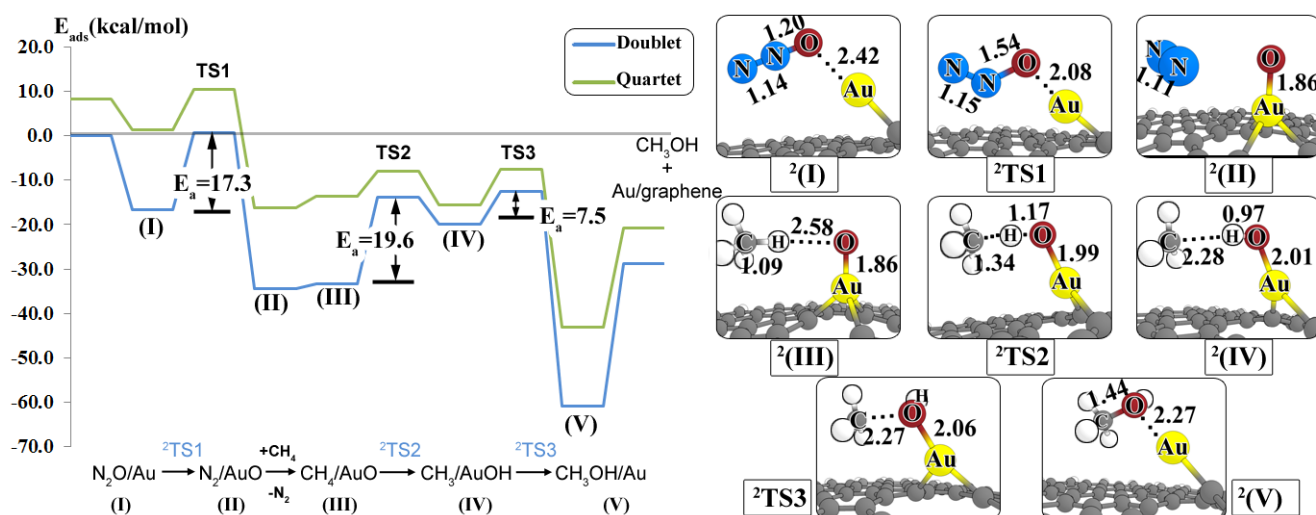

Fig. S10. Complete energetic profiles (kcal·mol<sup>-1</sup>) along the low-spin state (blue solid line) and the high-spin state (green solid line) of the Au-doped graphene catalyst for the partial oxidation of methane and the corresponding geometries.

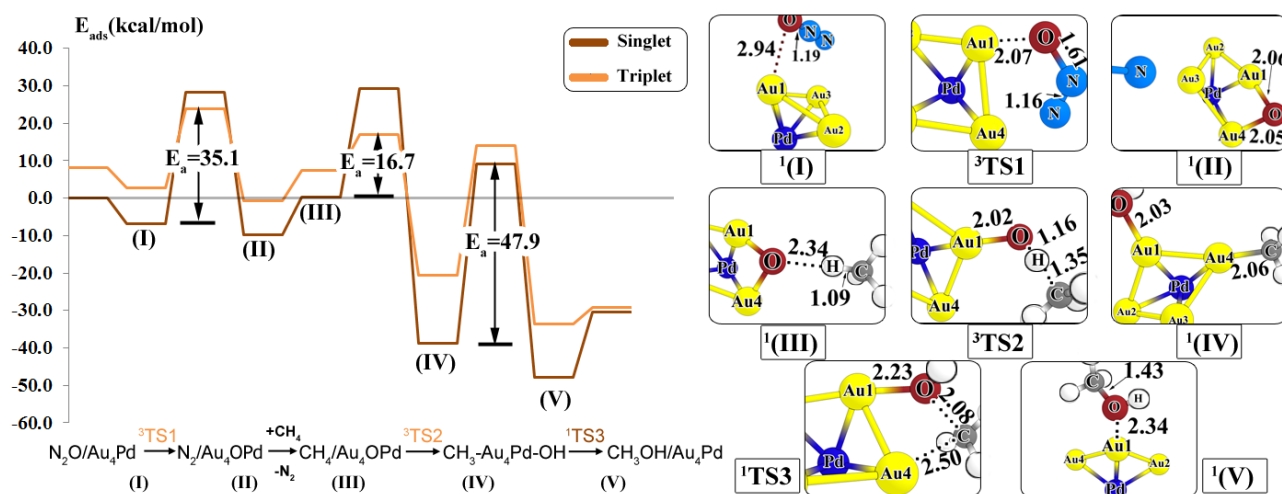

Fig. S11. Complete energetic profiles (kcal·mol<sup>-1</sup>) along the low-spin state (brown solid line) and the high-spin state (orange solid line) of the unsupported Au<sub>4</sub>Pd cluster for the partial oxidation of methane and the corresponding geometries.
